# Supplementary material
Source: PubMed Central journal article supplement (PMC3392532)
Supplement: NIHMS378899-supplement-1.pdf [file NIHMS378899-supplement-1.pdf]

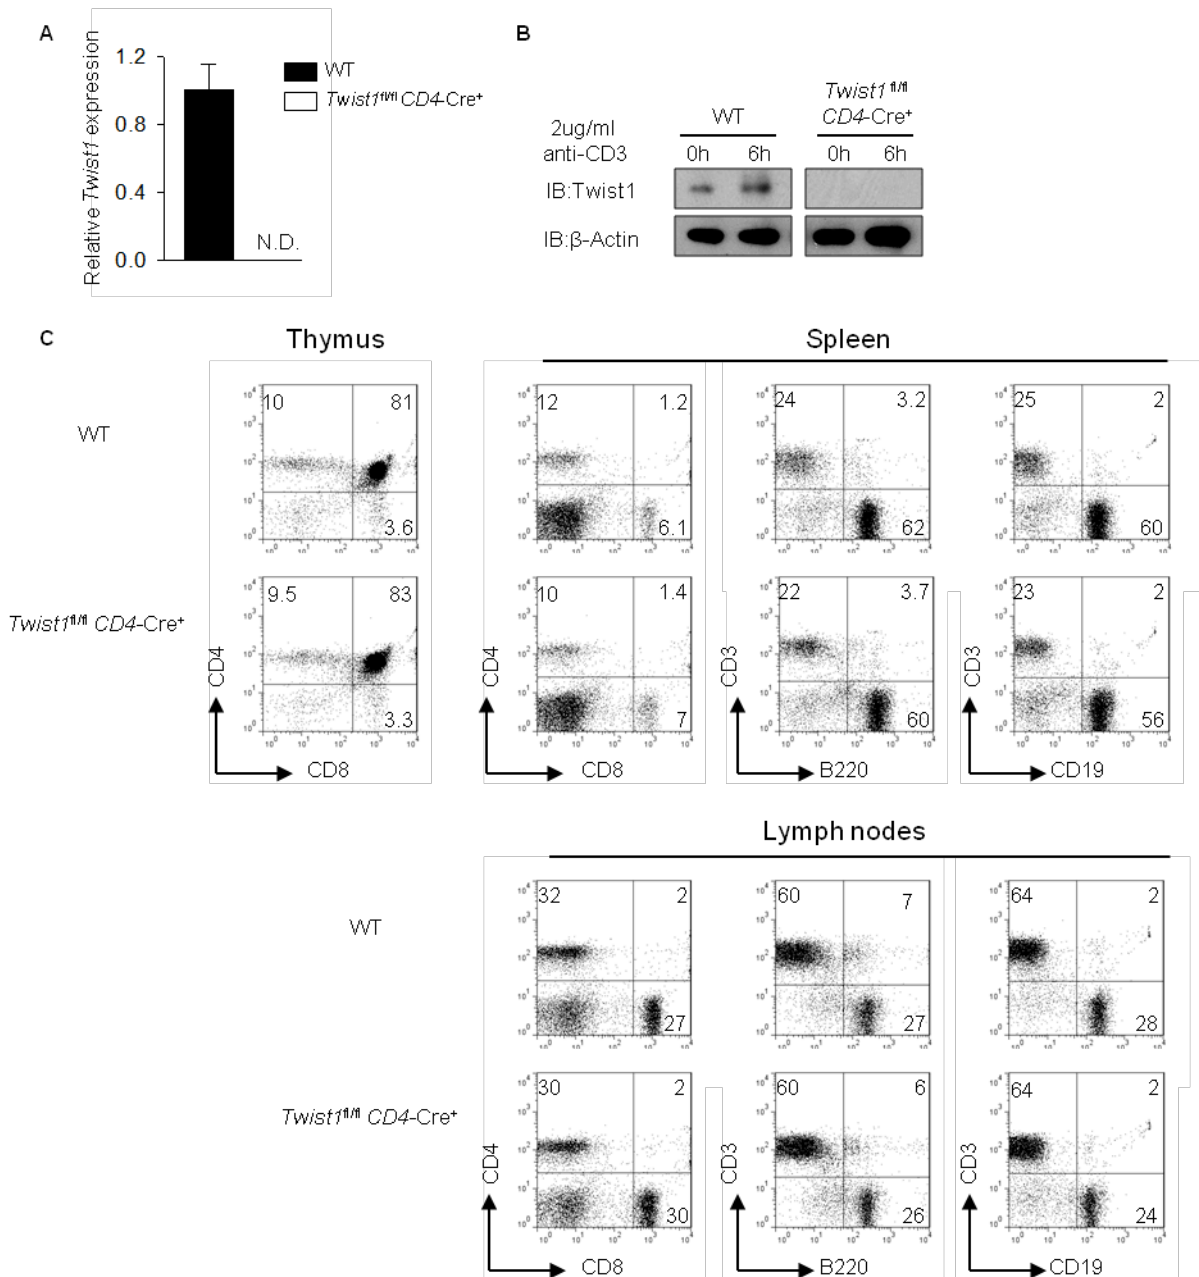

**Figure S1. Generation of mice with *Twist1*-deficient T cells.** Naïve  $CD4^+CD62^{hi}$  T cells from WT and *Twist1<sup>fl/fl</sup> CD4-Cre<sup>+</sup>* were stimulated under Th1-polarizing conditions. (A) Resting cells were used to measure *Twist1* expression by RT-qPCR. Results are the average  $\pm$  S.D. of replicated samples and are representative of three to four independent experiments with similar results. (B) *Twist1* protein expression in WT and *Twist1*-deficient Th1 cells after reactivated with 2ug/ml anti-CD3 for 6 h. (C) Total cells were isolated from thymus, spleen and lymph nodes of WT and *Twist1*-deficient mice and stained for cell surface markers. Data is representative of two independent experiments with similar results.
